# Supplementary material
Source: Research Square preprint supplement (doi:10.21203/rs.3.rs-9882432/v1)
Supplement: Supplementary file 2 [file 841bb2207f98edf4328e766b.docx]

**Energy Efficiency and Temporality in Early Urban Pottery Production:**

**Modelling Heat Transfer in Connected Pottery Firing Structures**

**(4th–3rd millennium BCE, Southwest Asia)**

Claire Padovani (claire.padovani2@gmail.com)1, Frédéric Lefèvre (frederic.lefevre@insa-lyon.fr)2, Johnny Samuele Baldi (js.baldi@mom.fr)1, Marc Kabemba Yangie (marc.kabemba-yangie@insa-lyon.fr)2, Marc Clausse (marc.clausse@insa-lyon.fr)2

1*UMR 5133 Archéorient, Lyon, France*

2*INSA Lyon, CNRS, CETHIL, UMR5008, Villeurbanne, F-69621, France*

Nomenclature

**Latin letters**

| a | Thermal diffusivity | m²·s⁻¹ | LHV | Lower heating value | J. kg⁻¹ |
| --- | --- | --- | --- | --- | --- |
| a, b, c, d, e | Molar fractions of flue gases | mol.mol-1 | Le | Lewis number | – |
| Bi | Biot number | – | m | Mass | kg |
| Cw | Thermal capacitance of wall node | J·K⁻¹ |  | Molar mass | kg.mol-1 |
| Ccer | Thermal capacitance of ceramic | J·K⁻¹ | ṁ | Mass flow rate | kg·s⁻¹ |
| cp | Specific heat capacity | J·kg⁻¹·K⁻¹ | n | Node number | – |
| D | Diameter | m | P | Pressure | Pa |
| Dv,f | Diffusion coefficient H20 in gas | m²·s⁻¹ | r | Radius | m |
| e | Wall thickness | m | R | Thermal resistance | K·W⁻¹ |
| eair | Excess air ratio | – | S | Heat exchange surface | m² |
| Fo | Fourier number | – | s | Specific surface | m²·kg⁻¹ |
| frad | Radiation fraction in combustion | – | t | Time | s |
| h | Heat transfer coefficient | W·m⁻²·K⁻¹ | T | Temperature | °C |
| hlv | Latent heat of vaporization | J. kg⁻¹ |  | Mean temperature | °C |
| hm | Mass transfer coefficient | m·s⁻¹ | w | Absolute humidity | kg·kg⁻¹ |
| H | Height | m | w* | Saturation absolute humidity | kg·kg⁻¹ |
| HHV | Higher heating value | J. kg⁻¹ | x | Depth in the wall | m |
| k | Thermal conductivity | W·m⁻¹·K⁻¹ | x, y, z | Wood composition | mol.mol-1 |
| L | Length | m | X | Humidity content | kg·kg⁻¹ |

**Greek letters**

| α | Angle | rad | ρ | Density | kg·m⁻³ |
| --- | --- | --- | --- | --- | --- |
| Δt | Time step | s | σ | Stefan–Boltzmann constant | W·m⁻²·K⁻⁴ |
| Δx | Spatial step | m |
| ε | Emissivity | – | τ | Wood humidity content | – |
| η | Efficiency | – | Φ | Heat flux | W |

**Subscripts**

| amb | Ambient | f | Flue gas | r | Radiation |
| --- | --- | --- | --- | --- | --- |
| atm | Atmospheric | fluid | Fluid | re | Residual value |
| c | Convection | g | Ground | sat | Saturation |
| cd | Conduction | h | Wet-bulb condition | sh | Shared |
| cer | Ceramic | in / out | In / out | v | Vapor |
| comb | Combustion | j | Control volume number | w | Wall |
| eq | Equivalent | l | Liquid | 0 | Initial value |
| evap | Evaporation |  |  |  |  |
