# Supplementary material
Source: Research Square preprint supplement (doi:10.21203/rs.3.rs-9882432/v1)
Supplement: Supplementary file 3 [file 96e458c8de15b0ef4a63ef4a.docx]

**Energy Efficiency and Temporality in Early Urban Pottery Production:**

**Modelling Heat Transfer in Connected Pottery Firing Structures**

**(4th–3rd millennium BCE, Southwest Asia)**

Claire Padovani (claire.padovani2@gmail.com)1, Frédéric Lefèvre (frederic.lefevre@insa-lyon.fr)2, Johnny Samuele Baldi (js.baldi@mom.fr)1, Marc Kabemba Yangie (marc.kabemba-yangie@insa-lyon.fr)2, Marc Clausse (marc.clausse@insa-lyon.fr)2

1*UMR 5133 Archéorient, Lyon, France*

2*INSA Lyon, CNRS, CETHIL, UMR5008, Villeurbanne, F-69621, France*

**Details of the multi-physics model**

**1. Transient heat conduction model in the firing structure wall and the ceramic**

An explicit scheme is used to numerically solve the one-dimensional transient heat equation in Cartesian coordinates in the wall of the firing structure and the floor (fig.13):

|  | (1) |
| --- | --- |

Where aw is the thermal diffusivity for the firing structure material and Tw is the temperature at depth x within the wall and time t. As the geometry of the firing structures is cylindrical (except the shared wall), the real heat exchange surfaces, Sin and Sout, are explicitly conserved in the model, and the wall thickness ew,eq is adjusted in order to conserve the total structure volume. This allows preserving the thermal inertia, while ensuring geometrical consistency of the heat transfer calculations. For Ground 1 to 3 and Wall 23 and 24, the Cartesian geometry ensures that the actual geometrical dimensions are preserved.

For the discretization, the time and space steps, Δt and Δx, are chosen such that the Fourier number, , is equal to 0.2, ensuring numerical stability. The thermal capacitance of each node is equal to Cw=ρwΔx Sw cp,w, except at the boundaries, where it is equal to Cw/2, with ρw and  cp,w denoting the material density and specific heat capacity respectively. Each node is separated by a heat conduction resistance , where kw is the thermal conductivity for the kiln material, Δx = ew,eq/(nj-1) for Wall 1 to 4 and Δx = ew/( nj -1) for Ground 1 to 3 and Wall 23 and 24, with nj the total number of nodes for wall or ground j.

Different boundary conditions are applied depending on the configuration. Three cases are considered: wall surfaces in contact with the external environment, wall or floor surfaces in contact with the ceramics (control volumes 2 and 4), and wall surfaces in contact with the firebox (control volumes 1 and 3). These boundary conditions are applied to the extreme temperature nodes of the walls and the ground in the equivalent electrical circuit analogy shown in the figures 11 and 12.

***Outer surfaces of wall 1 to 4 in contact with the external environment and lower boundary of Ground 1 to 3***

For the outer surfaces in contact with the external environment (fig. 10c), the following boundary condition is considered at x = ew,eq:

|  | (2) |
| --- | --- |

where the convective and radiative thermal resistances are calculated as , with hc and hr, denoting the convective and radiative heat transfer coefficients respectively, and S the exchange surface.

At the outer surface, radiative heat exchange is assumed to occur with a large isothermal surrounding environment at temperature Tamb​. The outer surface is assumed to be a grey surface with emissivity ε, with diffuse and isotropic emission:

|  | (3) |
| --- | --- |

where σ=5.67×10-8 Wm-2K-4 is the Stefan-Boltzmann constant and the temperatures are expressed in K.

A single convective heat transfer coefficient hc = 5 Wm-2K-1 is considered for all convection resistances of the problem. This standard value is used rather than an exchange coefficient based on correlations from the literature, considering that it is unrealistic to identify a correlation that accurately represents the complexity of the flow patterns around the ceramic inside the firing structure.

For the ground, following the assumption of a semi-infinite medium (fig. 10c), a lower boundary depth of 1 meter is considered in the model - with the temperature assumed constant and equal to the ambient temperature - this depth being greater than the thermal penetration depth throughout the entire heating process.

***Wall or floor surfaces in direct contact with the ceramics***

As only one node is considered for the ceramics in each firing structure, they are assumed to form a single opaque volume Cer 2 and Cer 4 that exchanges radiation with the surrounding furnace walls. Consequently, the radiative heat transfer reduces to radiative exchange between two surfaces: the ceramics and each surface of the wall. As the wall, also exchange heat by convection with the flue gas, the following boundary conditions are considered (fig. 11, 12):

|  | (4) |
| --- | --- |

for all the surface, except for Wall 24 in control volume 4, where the boundary condition applies also at x = ew:

|  | (5) |
| --- | --- |

Note that boundary conditions (4) also applies for ground temperature Tg2.

In equations (4) and (5), radiative heat transfer coefficients are calculated by considering radiative heat exchange between two grey surfaces of emissivity ε with diffuse and isotropic emission:

|  | (6) |
| --- | --- |

As the kiln and the ceramic are composed of the same material, a single emissivity ε is considered for both surfaces. At the inner surface, the wall is assumed to be surrounded by a ceramic surface of equivalent size, maintained at a uniform temperature Tcerj.

***Wall or floor surfaces in contact with firebox***

This case concerns control volumes 1 and 3, which form a radiative enclosure in which multiple surfaces exchange radiation with each other: Ground 1, Wall 1, and the surface of Cer 2 in contact with control volume 1; Ground 3, Wall 23, Wall 3 and the grate in control volume 3. For simplicity, and considering that the materials have high emissivity - which is further increased by soot deposition from the flue gases - these surfaces are treated as black bodies. Therefore, radiative resistances are considered for each pair of surfaces, with the corresponding view factors used to calculate the net radiative heat exchange.

Wood combustion is modeled in section 5. Wood combustion causes an increase in the temperature of the flue gases to Tf1,in (stage 1) and Tf3,in (stage 2), as well as a portion of the heat flux being radiated toward the walls, φfirej,wj. Together, these heat transfer modes lead to the following boundary condition:

|  | (7) |
| --- | --- |

**2. Transient heat conduction model in the ceramic and the grate**

Considering the small thickness of the ceramic, internal heat conduction can be neglected as the Biot number , where and L are respectively the ceramic thermal conductivity and characteristic length, defined here as its thickness. The ceramics exchange heat by radiation with the surrounding walls facing them, and by convection within their own volume. In SCFS, the surface of Cer 2 in contact with control volume 1 also receives heat by radiation from the fire and by convection from the flue gas rising in control volume 1. In K, the ceramics also exchange heat by radiation with the grate, which is assumed to be a full planar radiating surface. Finally, the ceramics are also cooled by evaporation during the drying process. Therefore, the equations for the temperature of Cer 2 and Cer 4 can be expressed as:

|  | (8) |
| --- | --- |
|  | (9) |

where φevap is the heat flux of evaporation derived in section 4. Ccer is the ceramic thermal capacitance, which includes the contribution of both the dry ceramic and the water contained within it:

|  | (10) |
| --- | --- |

where mcer and cp,cer are the dry ceramic mass and specific heat capacity respectively, and and are the liquid water mass and specific heat capacity respectively. As for the wall, a convective heat transfer coefficient hc,cer = 5 Wm-2K-1 is considered.

An explicit scheme is used to numerically solve the equation. The heat exchange surface Scer for the convective thermal resistance is calculated using the ceramic specific surface scer: Scer = scermcer, except for the surface of Cer 2 in contact with control volume 1, where the contact surface is considered. For the radiative thermal resistance, the same surface as the wall is considered following the hypotheses discussed above. As a single node is considered for the ceramic, radiative heat transfer between the ceramic is not considered in this simple modelling approach.

A similar approach to that used for the ceramics is applied to the grate. As it is located between control volumes 3 and 4, the grate exchanges heat by convection and radiation with these two environments:

|  | (11) |
| --- | --- |

**3. Temperature of the flue gases**

The mean temperature of the flue gases within each control volume is calculated using a fluid resistance , based on the energy balance of the gas flow between the inlet temperature Tf,in and the outlet temperature Tf,out:

|  | (12) |
| --- | --- |

where φf is the heat flux supplied by the flue gases to heat and dry the ceramic, as well as to heat the wall of the firing structure, and are the gas flow rate and specific heat respectively. is calculated from an energy balance at the corresponding node. The gas mass flow rate at the inlet is calculated in section 5, dedicated to wood combustion, and increases along the firing system due to water evaporation during the drying process, described in the next section. Once is calculated, the outlet temperature Tf,out, which corresponds to the inlet temperature of the next control volume, is determined as:

**4. Ceramic Drying**

The mass of water within the ceramic is linked to the ceramic hygrometric level Xcer:

|  | (13) |
| --- | --- |

The drying kinetics of the ceramic is modelled as a function of the residual humidity content, following the approach of Lima et *al*. 2021:

|  | (14) |
| --- | --- |

where is the mass flow rate of evaporation, Xr is the residual humidity content of the dried ceramic and hm is the mass transfer coefficient. In the following, equations (15) to (21) are used to derive an expression for hm.

The convective mass transfer of evaporated water from the ceramic surface to the surrounding bulk gas flow during drying can be expressed as:

|  | (15) |
| --- | --- |

where ρf is the density of the flue gases, hm,f  is the convective mass transfer coefficient of water vapor, wf is the absolute humidity of the bulk gas, is the saturation absolute humidity of the gas evaluated at the wet-bulb temperature corresponding to the ceramic temperature :

|  | (16) |
| --- | --- |

where Pv,sat is the water saturation pressure. The wet-bulb temperature is calculated from an energy balance at the ceramic surface, following psychrometric theory:

|  | (17) |
| --- | --- |

where hlv is the latent heat of vaporization of water and cp,h the specific heat capacity of humid air, both evaluated at the bulb temperature. Note that equations (15) to (17) are coupled and nonlinear, and therefore must be solved iteratively at each time step.

The convective mass transfer coefficient of water vapor is calculated using the Chilton–Colburn analogy for heat and mass transfer (Çengel, Ghajar 2015):

|  | (18) |
| --- | --- |

where Dv,f is the diffusion coefficient of water vapor in the flue gas, kf the thermal conductivity of the gas and Le, the Lewis number:

|  | (19) |
| --- | --- |
|  | (20) |

Where P is the atmospheric pressure expressed in Pa. For simplicity, the thermophysical properties of the gas are assumed to be equal to those of air in equations ( 18) to ( 20), following the approach of Lima et *al.* 2021.

The two expressions of in equations ( 14) and ( 15) are equalized in order to calculate the mass transfer coefficient hm with X replaced by to prevent divergence for small value of X.

|  | (21) |
| --- | --- |

The heat flux of evaporation used in equation (8) is calculated as:

|  | (22) |
| --- | --- |

where is the specific heat capacity of vapour water.

**5. Wood combustion**

The resolution of the thermal model (fig. 11) requires the temperature of the flue gases Tf,in. This temperature is calculated using the classical combustion equations (Autret, Rogaume 2011; Lallemand 2013), assuming that wood is primarily composed of carbon, hydrogen, and oxygen:

|  | (23) |
| --- | --- |

Equation (19) accounts for the humidity content τ for the wood and considers an excess air ratio eair during combustion. The molar fractions of CO2, H2O, N2 and excess in air per mol of wood are given by:

|  | (24) |
| --- | --- |

where x, y and z correspond to the elemental composition of the wood.

The temperature of the flue gas Tf,in is calculated from these molar fractions and the specific heat capacities of the individual gases present in the combustion mixture. It also accounts for the fact that a fraction frad of the combustion energy does not increase the flue gas temperature but is directly radiated to the walls.

|  | (25) |
| --- | --- |

where is the combustion efficiency and LHV is the wood lower heating value, computed from the higher heating value HHV, the molar mass of each wood constituent and the wood humidity content τ:

|  | (26) |  |
| --- | --- | --- |

Equations (23) and (24) enable to calculate the mass flow rate of flue gas per mass of wood, the absolute humidity of the bulk gas and the gas density necessary to solve the equations presented in sections 1 and 4. The density of the flue gases within the firing structure is assumed to vary inversely with temperature according to the perfect gas law:

|  | (27) |
| --- | --- |

where is the gas density at T = 0°C.

Finally, the heat flux φfire = - radiated toward the walls of the control volume - is distributed according to the radiative shape factors between the floor and each wall of the control volume.
